# Supplementary material
Source: PubMed Central journal article supplement (PMC9384659)
Supplement: ciac642_supplementary_data.pdf [file ciac642_supplementary_data.pdf]

**Supplementary Table S1: SARS-CoV-2 variants mutations introduced in the spike plasmid for production of SARS-CoV-2 pseudovirions for analysis in PsVNA.**

| <b>SARS-CoV-2 variant</b>            | <b>Mutations constructed in the spike plasmids</b>                                                                                                                                                                                                                |
|--------------------------------------|-------------------------------------------------------------------------------------------------------------------------------------------------------------------------------------------------------------------------------------------------------------------|
| <b>Omicron (BA.1/<br/>B.1.1.529)</b> | A67V, H69-70del, T95I, G142D, V143-145del, Y145D, N211del, L212I, ins214EPE, G339D, S371L, S373P, S375F, K417N, N440K, G446S, S477N, T478K, E484A, Q493R, G496S, Q498R, N501Y, Y505H, T547K, D614G, H655Y, N679K, P681H, N764K, D796Y, N856K, Q954H, N969K, L981F |
| <b>Omicron (BA.1.1)</b>              | A67V, del69 70, T95I, del142 144, Y145D, del211, L212I, ins214EPE, G339D, R346K, S371L, S373P, S375F, K417N, N440K, G446S, S477N, T478K, E484A, Q493R, G496S, Q498R, N501Y, Y505H, T547K, D614G, H655Y, N679K, P681H, N764K, D796Y, N856K, Q954H, N969K, L981F    |
| <b>Omicron (BA.2)</b>                | T19I, delL24, delP25, delP26, A27S, G142D, V213G, G339D, S371F, S373P, S375F, T376A, D405N, R408S, K417N, N440K, S477N, T478K, E484A, Q493R, Q498R, N501Y, Y505H, D614G, H655Y, N679K, P681H, N764K, D796Y, Q954H, N969K                                          |
| <b>Omicron (BA.2.12.1)</b>           | BA.2 spike mutations + L452Q + S704L                                                                                                                                                                                                                              |
| <b>Omicron (BA.3)</b>                | A67V, del69-70, del142-144, Y145D, del211, L212I, G339D, S371F, S373P, S375F, D405N, K417N, N440K, G446S, S477N, T478K, E484A, Q493R, Q498R, N501Y, Y505H, D614G, H655Y, N679K, P681H, N764K, D796Y, Q954H, N969K                                                 |
| <b>Omicron (BA.4/BA.5)</b>           | T19I, delL24, delP25, delP26, A27S, del69 70, G142D, V213G, G339D, S371F, S373P, S375F, T376A, D405N, R408S, K417N, N440K, L452R, S477N, T478K, E484A, F486V, Q498R, N501Y, Y505H, D614G, H655Y, N679K, P681H, N764K, D796Y, Q954H, N969K                         |

Table S2: Neutralization titers of convalescent plasma, IVIG and hCoV-2IG against SARS-CoV-2 variants\*

|                                                                                       | WA-1   | Omicron BA.1 | Omicron BA.1.1 | Omicron BA.2 | Omicron BA.2.12.1 | Omicron BA.3 | Omicron BA.4/BA.5 |
|---------------------------------------------------------------------------------------|--------|--------------|----------------|--------------|-------------------|--------------|-------------------|
| <b>IVIG batches produced in 2019 prior to COVID-19</b>                                |        |              |                |              |                   |              |                   |
| 2019-IVIG-1                                                                           | 10     | 10           | 10             | 10           | 10                | 10           | 10                |
| 2019-IVIG-2                                                                           | 10     | 10           | 10             | 10           | 10                | 10           | 10                |
| 2019-IVIG-3                                                                           | 10     | 10           | 10             | 10           | 10                | 10           | 10                |
| 2019-IVIG-4                                                                           | 10     | 10           | 10             | 10           | 10                | 10           | 10                |
| 2019-IVIG-5                                                                           | 10     | 10           | 10             | 10           | 10                | 10           | 10                |
| 2019-IVIG-6                                                                           | 10     | 10           | 10             | 10           | 10                | 10           | 10                |
| 2019-IVIG-7                                                                           | 10     | 10           | 10             | 10           | 10                | 10           | 10                |
| 2019-IVIG-8                                                                           | 10     | 10           | 10             | 10           | 10                | 10           | 10                |
| 2019-IVIG-9                                                                           | 10     | 10           | 10             | 10           | 10                | 10           | 10                |
| 2019-IVIG-10                                                                          | 10     | 10           | 10             | 10           | 10                | 10           | 10                |
| 2019-IVIG-11                                                                          | 10     | 10           | 10             | 10           | 10                | 10           | 10                |
| 2019-IVIG-12                                                                          | 10     | 10           | 10             | 10           | 10                | 10           | 10                |
| 2019-IVIG-13                                                                          | 10     | 10           | 10             | 10           | 10                | 10           | 10                |
| 2019-IVIG-14                                                                          | 10     | 10           | 10             | 10           | 10                | 10           | 10                |
| <b>IVIG batches produced in 2020</b>                                                  |        |              |                |              |                   |              |                   |
| 2020-IVIG-1                                                                           | 10.0   | 10           | 10             | 10           | 10                | 10           | 10                |
| 2020-IVIG-2                                                                           | 10.0   | 10           | 10             | 10           | 10                | 10           | 10                |
| 2020-IVIG-3                                                                           | 10.0   | 10           | 10             | 10           | 10                | 10           | 10                |
| 2020-IVIG-4                                                                           | 20.7   | 10           | 10             | 10           | 10                | 10           | 10                |
| 2020-IVIG-5                                                                           | 28.2   | 10           | 10             | 10           | 10                | 10           | 10                |
| 2020-IVIG-6                                                                           | 48.9   | 10           | 10             | 10           | 10                | 10           | 10                |
| 2020-IVIG-7                                                                           | 51.0   | 10           | 10             | 10           | 10                | 10           | 10                |
| 2020-IVIG-8                                                                           | 43.5   | 10           | 10             | 10           | 10                | 10           | 10                |
| 2020-IVIG-9                                                                           | 49.9   | 10           | 10             | 10           | 10                | 10           | 10                |
| 2020-IVIG-10                                                                          | 30.5   | 10           | 10             | 10           | 10                | 10           | 10                |
| 2020-IVIG-11                                                                          | 62.1   | 10           | 10             | 10           | 10                | 10           | 10                |
| 2020-IVIG-12                                                                          | 38.2   | 10           | 10             | 10           | 10                | 10           | 10                |
| 2020-IVIG-13                                                                          | 25.8   | 10           | 10             | 10           | 10                | 10           | 10                |
| 2020-IVIG-14                                                                          | 26.4   | 10           | 10             | 10           | 10                | 10           | 10                |
| <b>Convalescent plasma batches produced from COVID-19 survivors collected in 2020</b> |        |              |                |              |                   |              |                   |
| 2020-CP-1                                                                             | 102.3  | 10           | 10             | 10           | 10                | 10           | 10                |
| 2020-CP-2                                                                             | 153.2  | 25.7         | 10             | 10           | 10                | 10           | 10                |
| 2020-CP-3                                                                             | 127.9  | 10           | 10             | 10           | 10                | 10           | 10                |
| 2020-CP-4                                                                             | 143.7  | 10           | 10             | 10           | 10                | 10           | 10                |
| 2020-CP-5                                                                             | 10     | 10           | 10             | 10           | 10                | 10           | 10                |
| 2020-CP-6                                                                             | 159.9  | 10           | 10             | 10           | 10                | 10           | 10                |
| 2020-CP-7                                                                             | 69.2   | 10           | 10             | 10           | 10                | 10           | 10                |
| 2020-CP-8                                                                             | 67.5   | 10           | 10             | 10           | 10                | 10           | 10                |
| 2020-CP-9                                                                             | 215.7  | 10           | 10             | 10           | 10                | 10           | 10                |
| 2020-CP-10                                                                            | 2971.7 | 77.8         | 80.6           | 60.6         | 78.6              | 53.1         | 94.7              |
| <b>Convalescent plasma batches produced from COVID-19 survivors collected in 2022</b> |        |              |                |              |                   |              |                   |
| 2022-CP-1                                                                             | 1341.1 | 911.1        | 892.4          | 515.4        | 293.2             | 535.9        | 98.6              |
| 2022-CP-2                                                                             | 3854.3 | 1768.0       | 1699.4         | 909.4        | 496.8             | 1060.3       | 235.5             |
| 2022-CP-3                                                                             | 646.6  | 512.4        | 527.9          | 256.4        | 114.5             | 275.1        | 46.9              |
| 2022-CP-4                                                                             | 937.8  | 648.6        | 690.2          | 366.3        | 239.3             | 384.2        | 81.7              |
| 2022-CP-5                                                                             | 435.0  | 319.7        | 287.8          | 157.1        | 69.0              | 161.4        | 26.1              |
| 2022-CP-6                                                                             | 1445.8 | 902.6        | 819.8          | 435.8        | 256.0             | 520.6        | 84.3              |
| <b>hCoV-2IG batches produced from COVID-19 convalescent plasma donors</b>             |        |              |                |              |                   |              |                   |
| hCoV-2IG-1                                                                            | 4553.1 | 162.3        | 117.9          | 142.1        | 113.7             | 90.7         | 95.6              |
| hCoV-2IG-2                                                                            | 2469.7 | 225.7        | 198.1          | 144.4        | 139.7             | 131.2        | 85.5              |
| hCoV-2IG-3                                                                            | 3732.2 | 234.3        | 105.8          | 128.5        | 192.5             | 69.8         | 81.7              |
| hCoV-2IG-4                                                                            | 2219.1 | 171.5        | 82.5           | 72.2         | 63.4              | 59.6         | 42.7              |
| hCoV-2IG-5                                                                            | 7303.3 | 184.3        | 235            | 228.8        | 214.8             | 132.7        | 133.9             |
| hCoV-2IG-6                                                                            | 1898.1 | 36.5         | 38.9           | 122          | 10.0              | 10.0         | 10.0              |
| hCoV-2IG-7                                                                            | 6542.3 | 3405.1       | 1418.4         | 1117.9       | 751.4             | 706.8        | 753.4             |
| hCoV-2IG-8                                                                            | 1742.7 | 195.3        | 162.4          | 118.8        | 121.8             | 85.9         | 51.0              |

\* PsVNA titer Cut-off value: 1:10.
